# Supplementary material for: Sensory Capacities and Eating Behavior: Intriguing Results from a Large Cohort of Italian Individuals
Source: MDPI journal article supplement (doi:10.3390/foods11050735), 2022-03-02

## A. Liking for meat

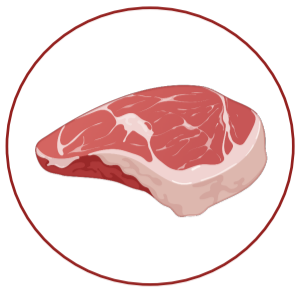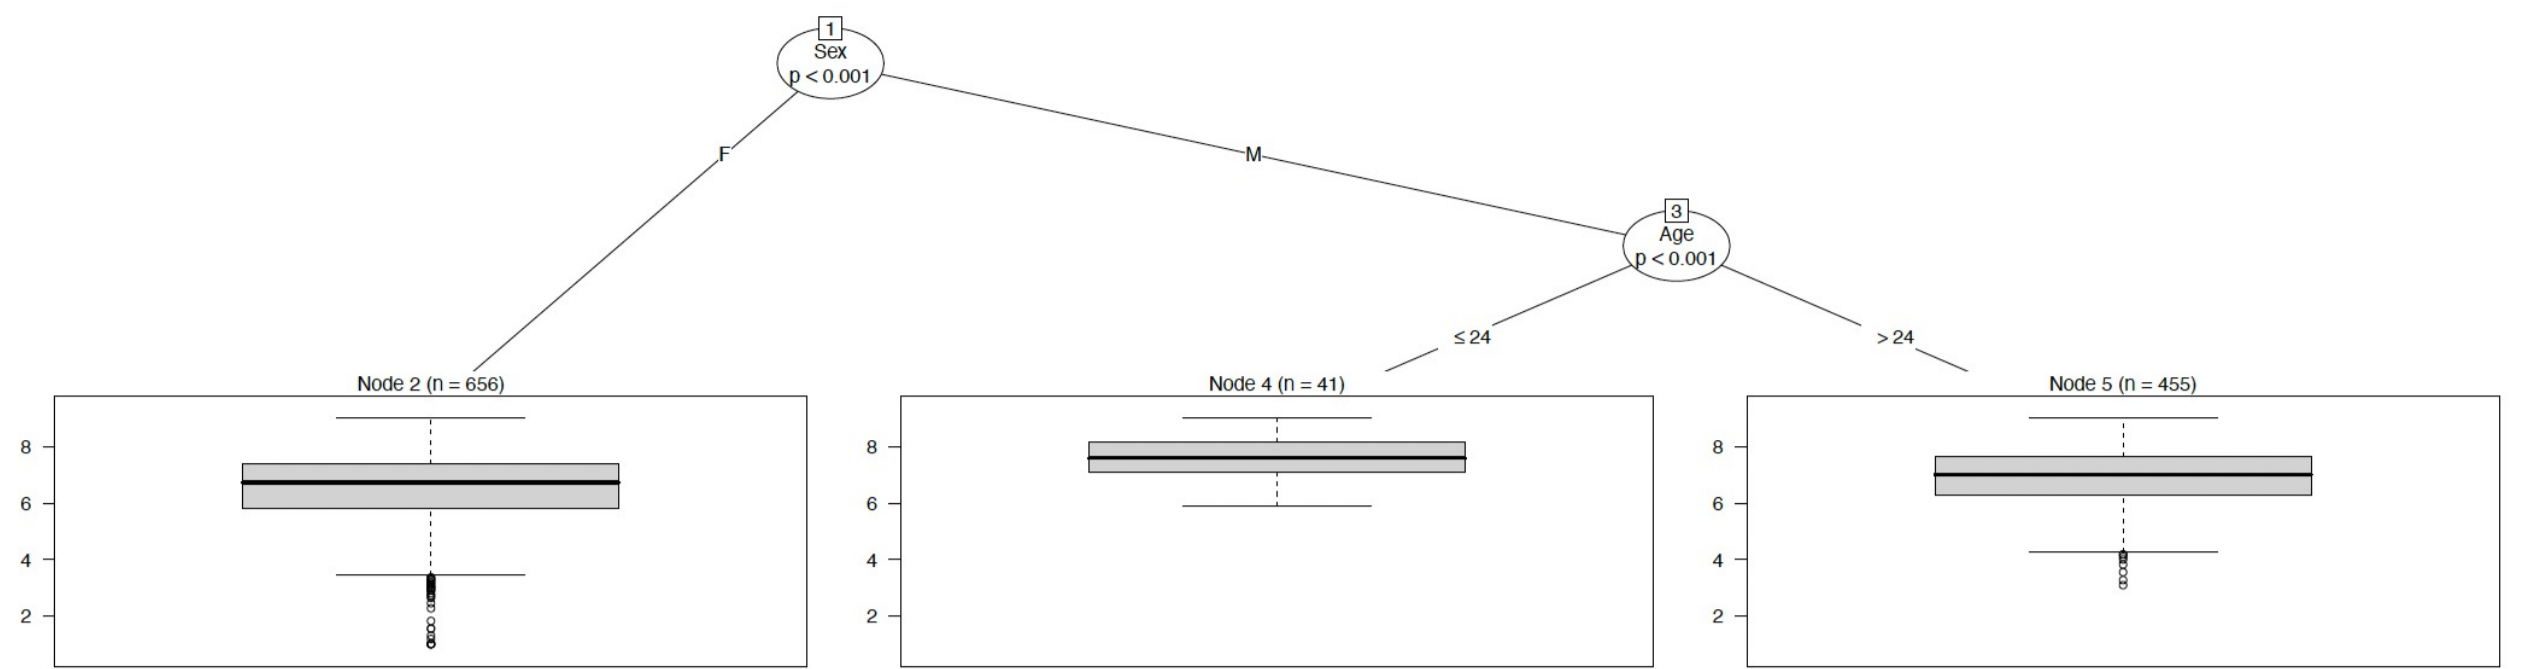

## B. Liking for vegetables

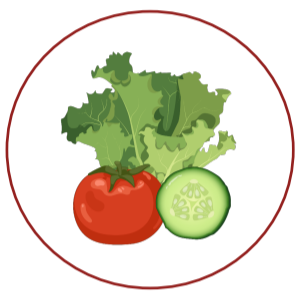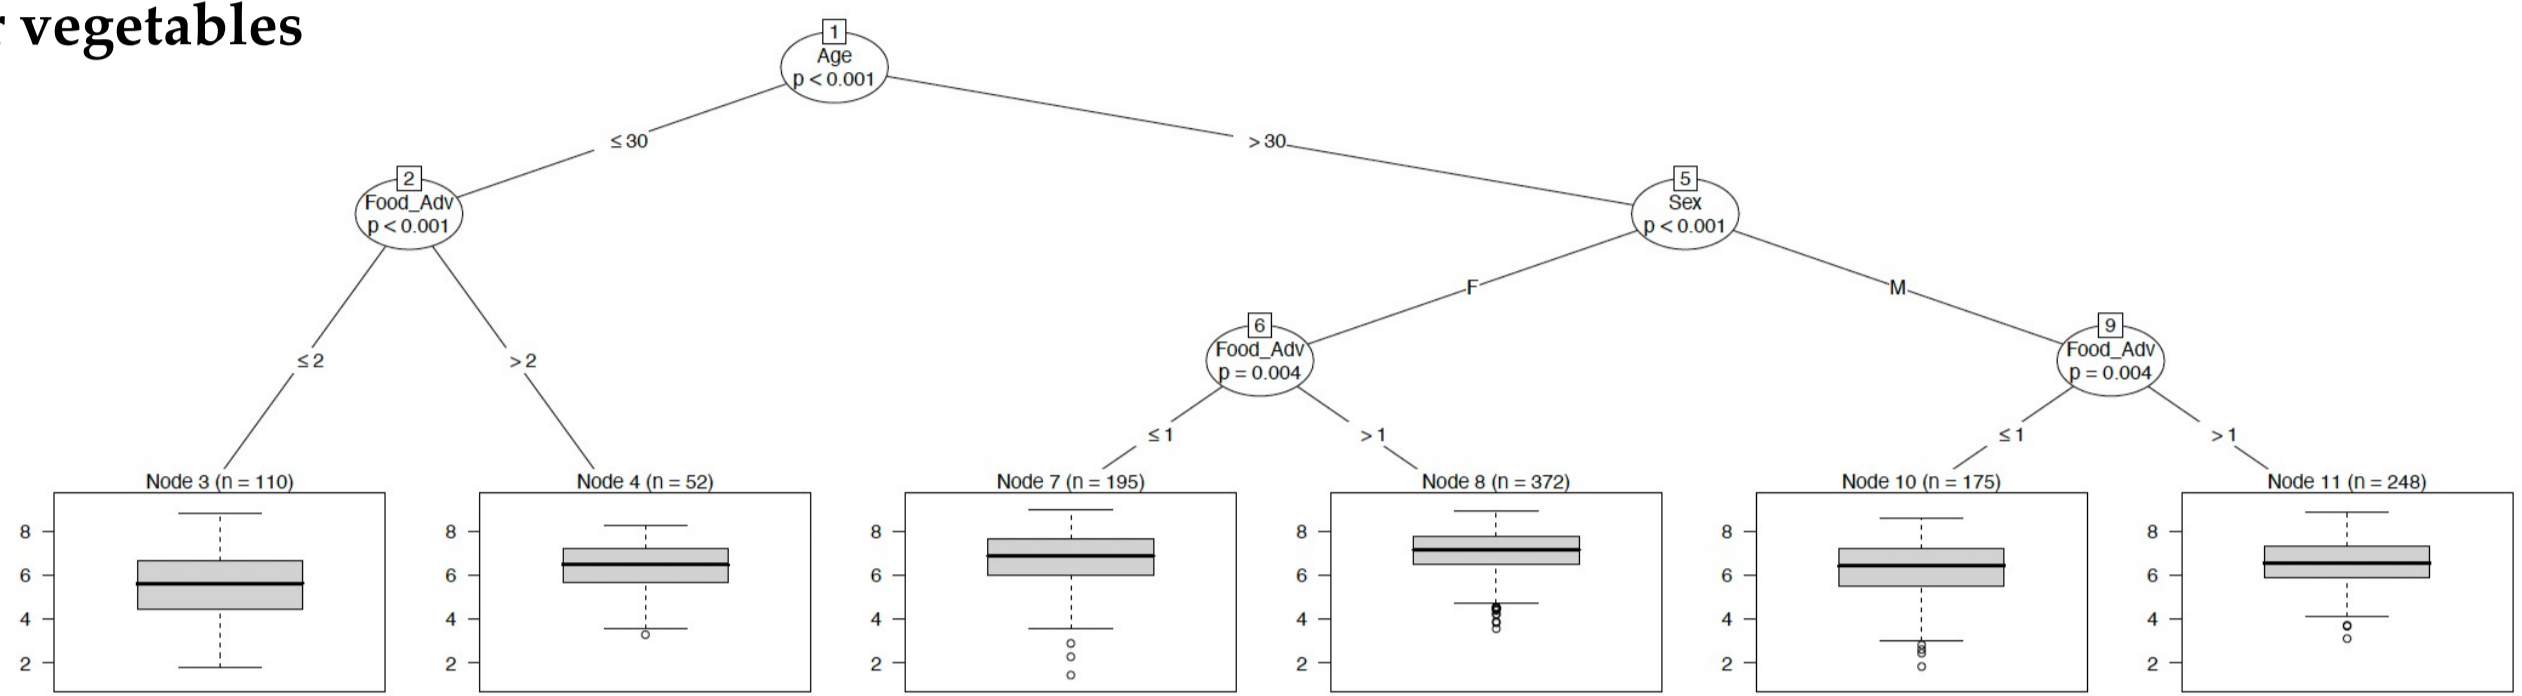

## C. Liking for cheeses

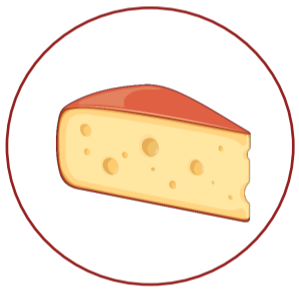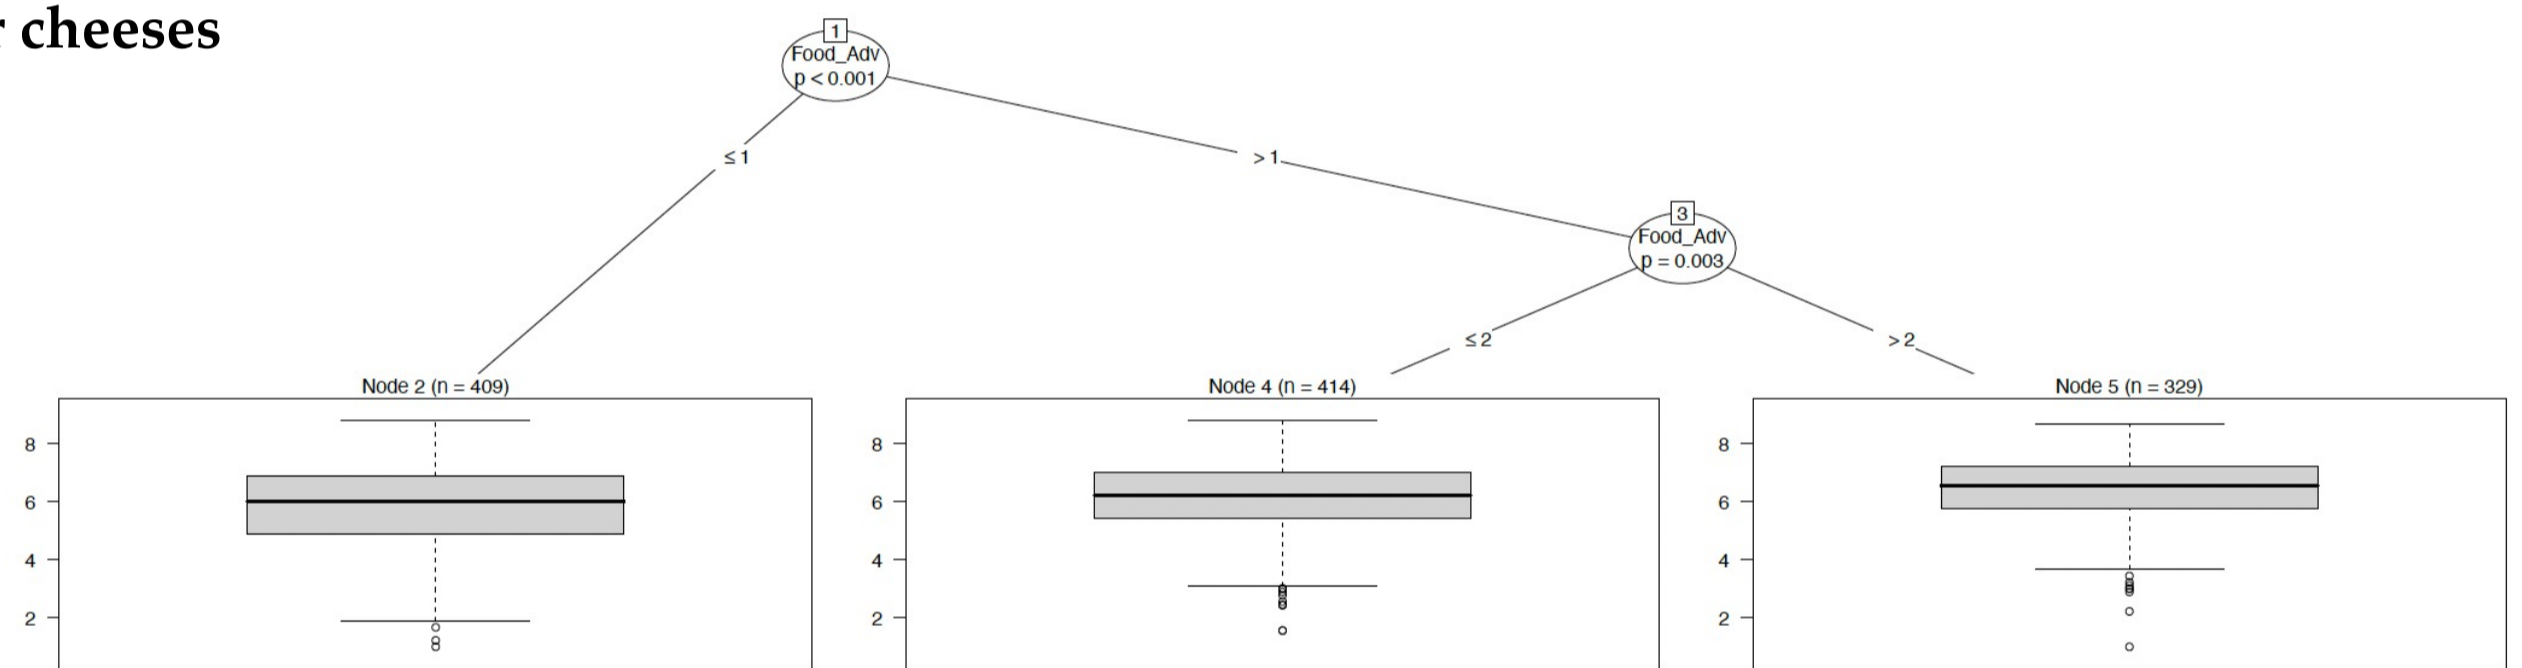

## D. Liking for fruit

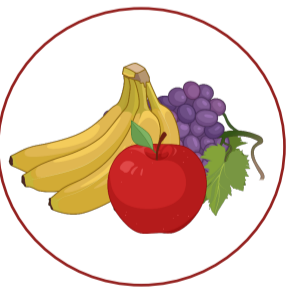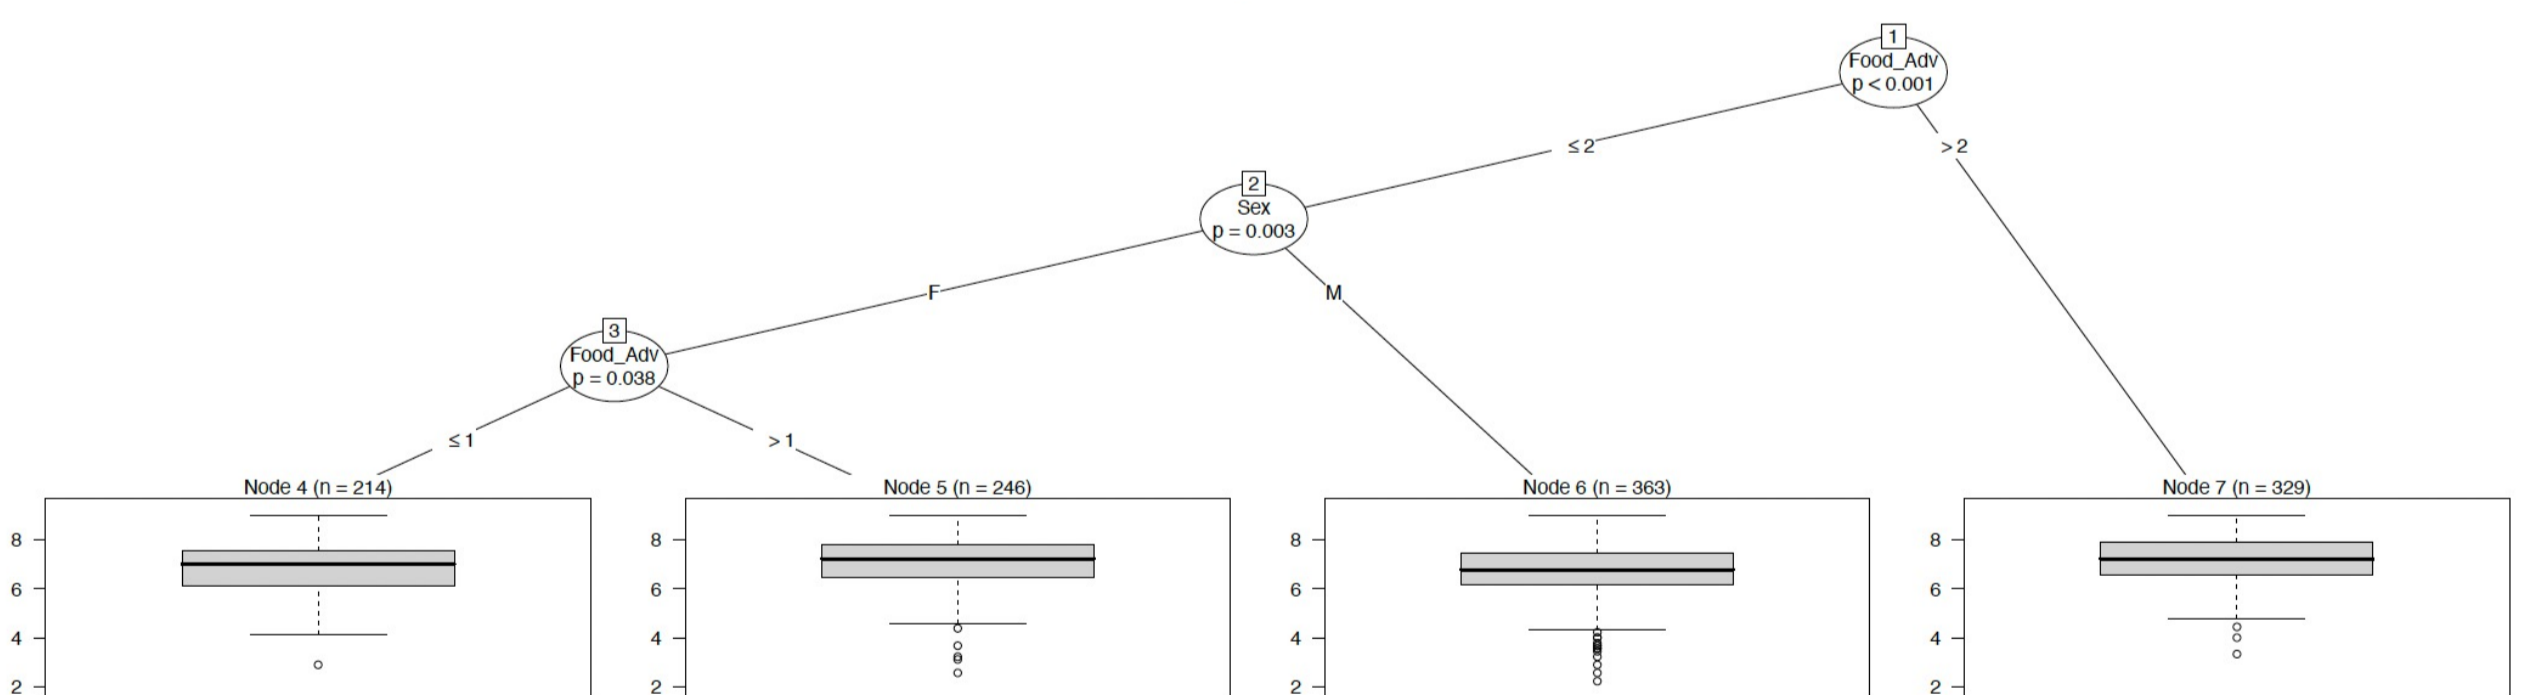

## E. Liking for fish

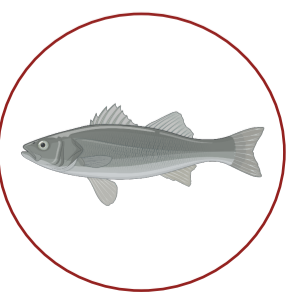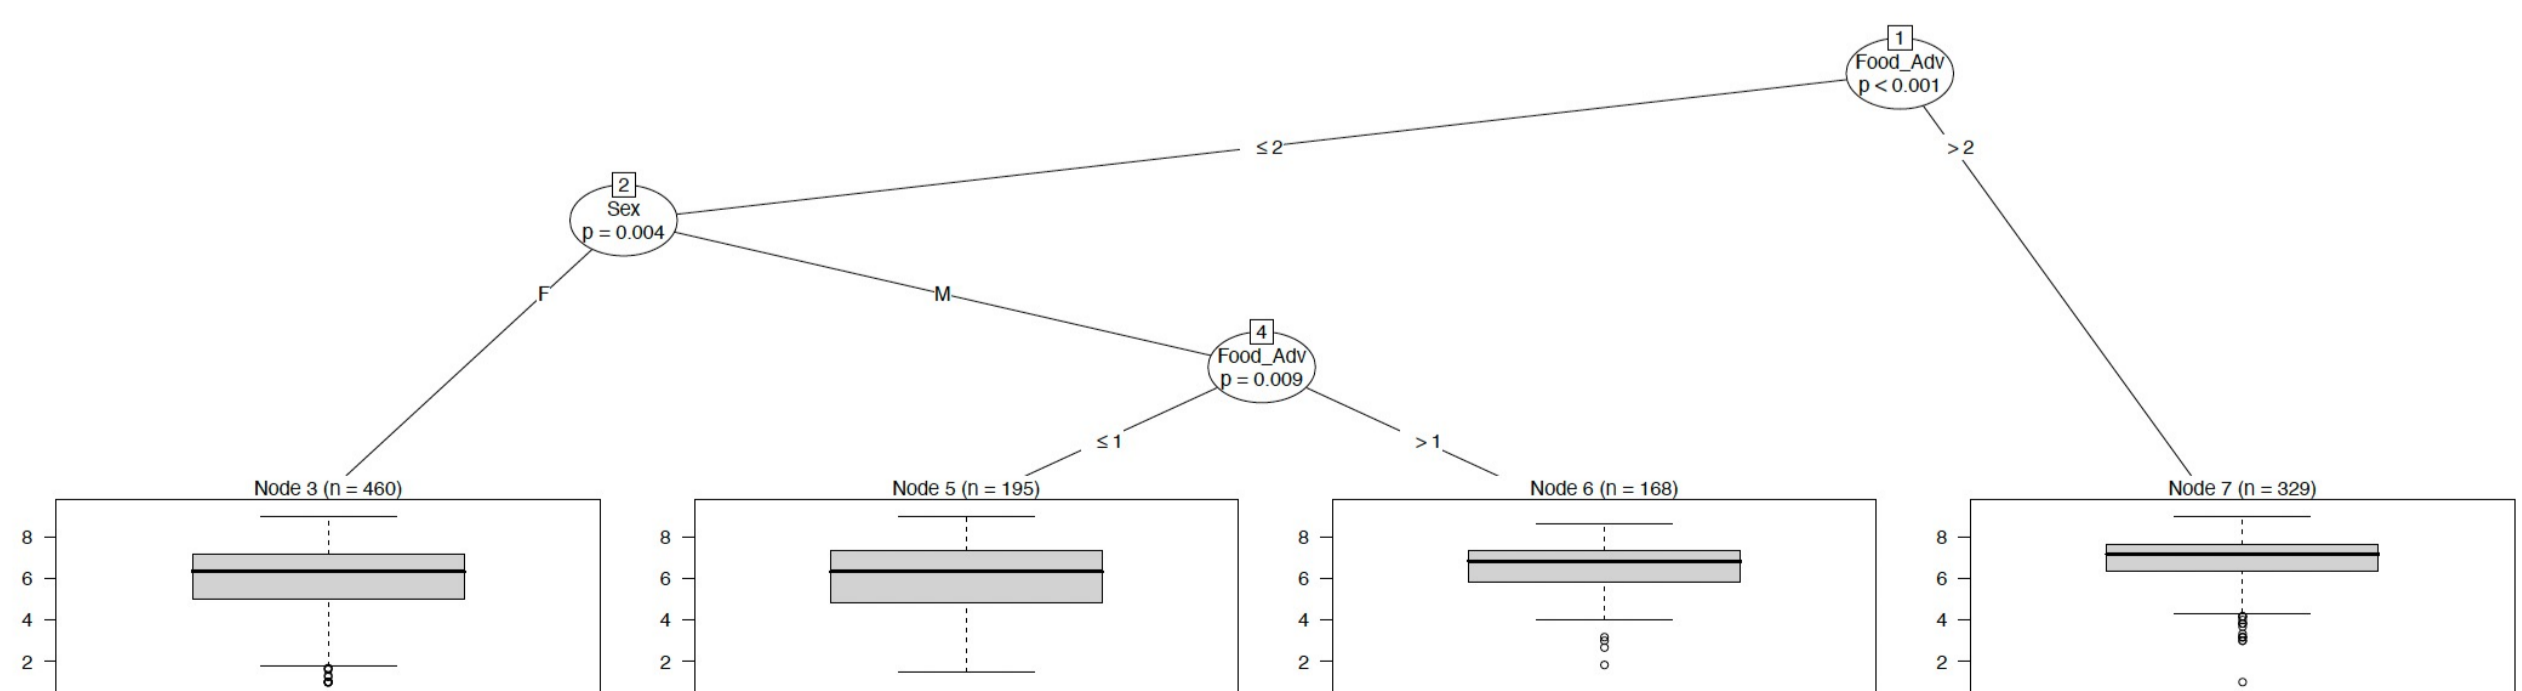

Supplement: s1 [file s1]
